# Supplementary figures and images for: Proteome Investigation of Rat Lungs Subjected to Ex Vivo Perfusion (EVLP)
Source: MDPI journal article supplement (doi:10.3390/molecules23123061), 2018-11-22

# Native vs pre-EVLP

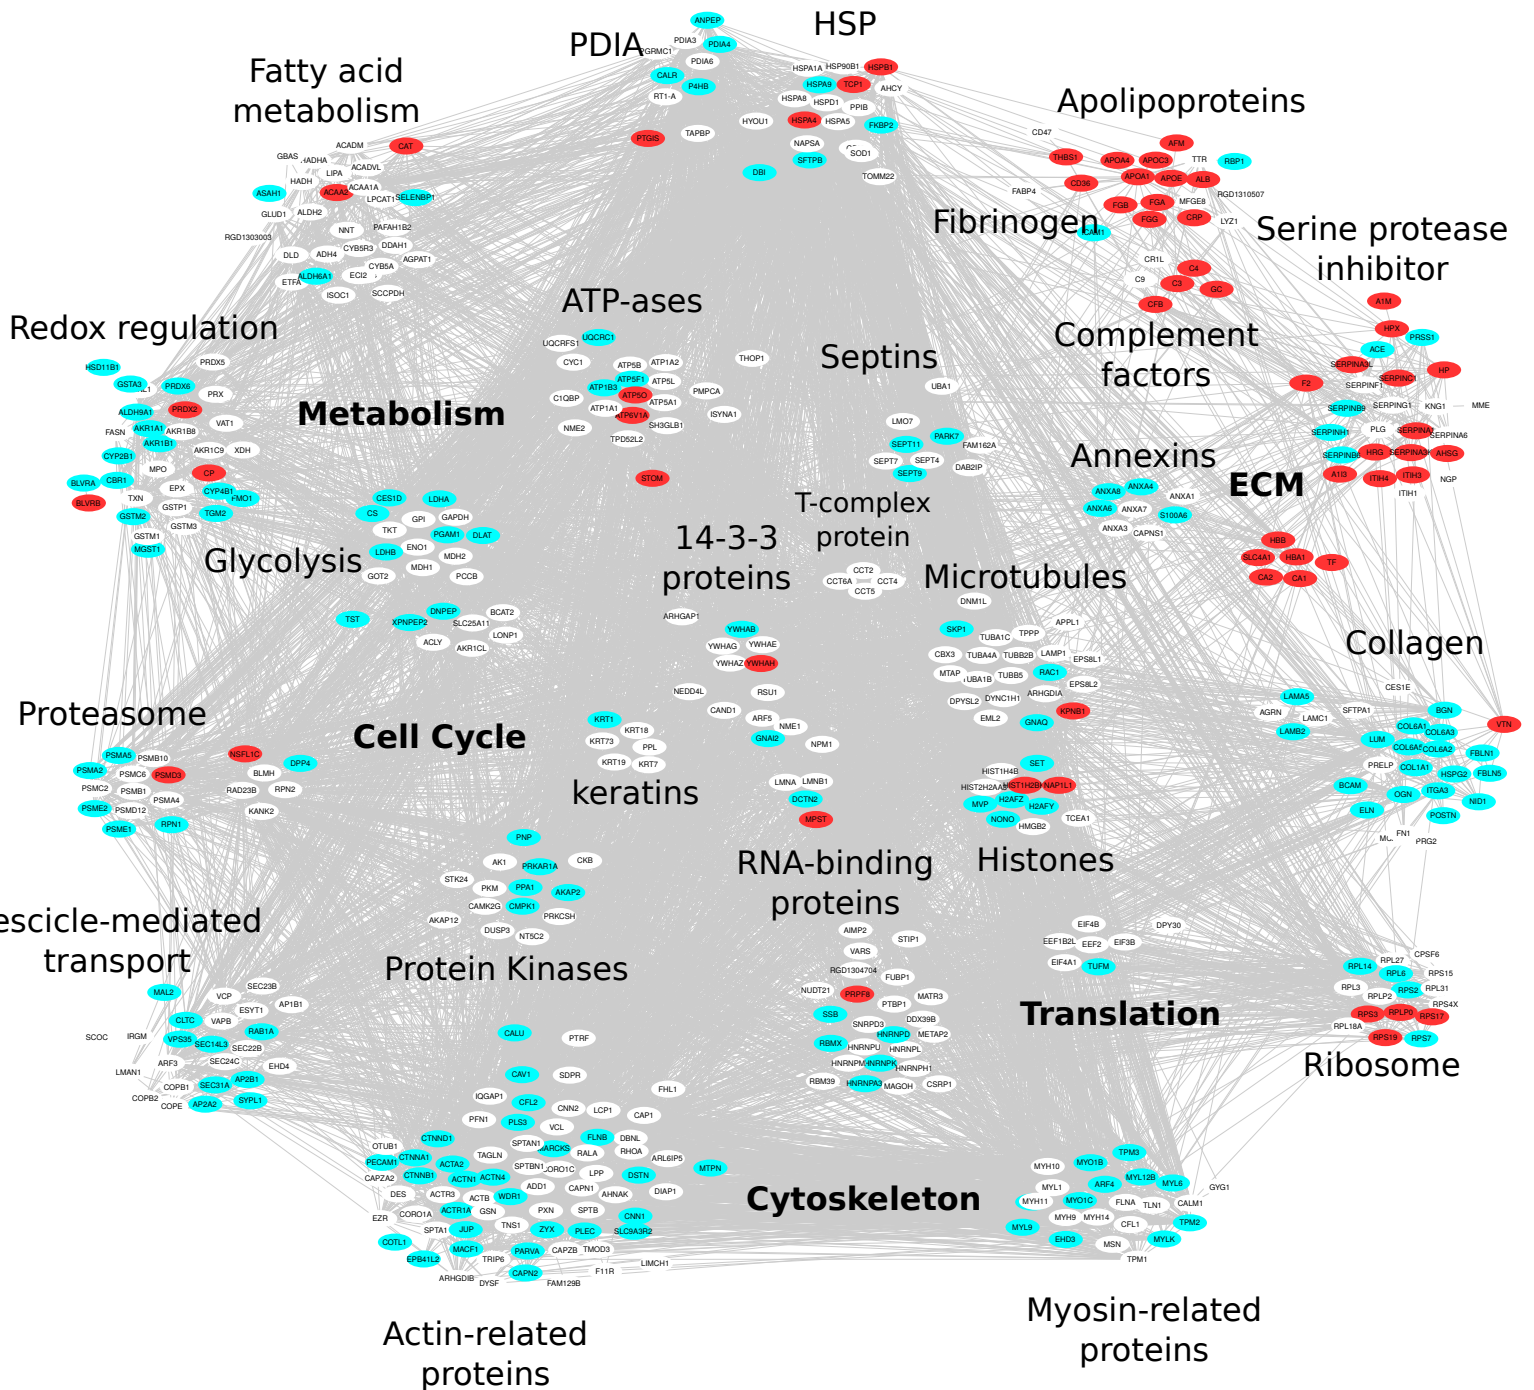

● up-regulated in Native  
● up-regulated in pre-EVLP  
● unchanged

Supplement: s1 [file s1]

# Native vs post-EVLP

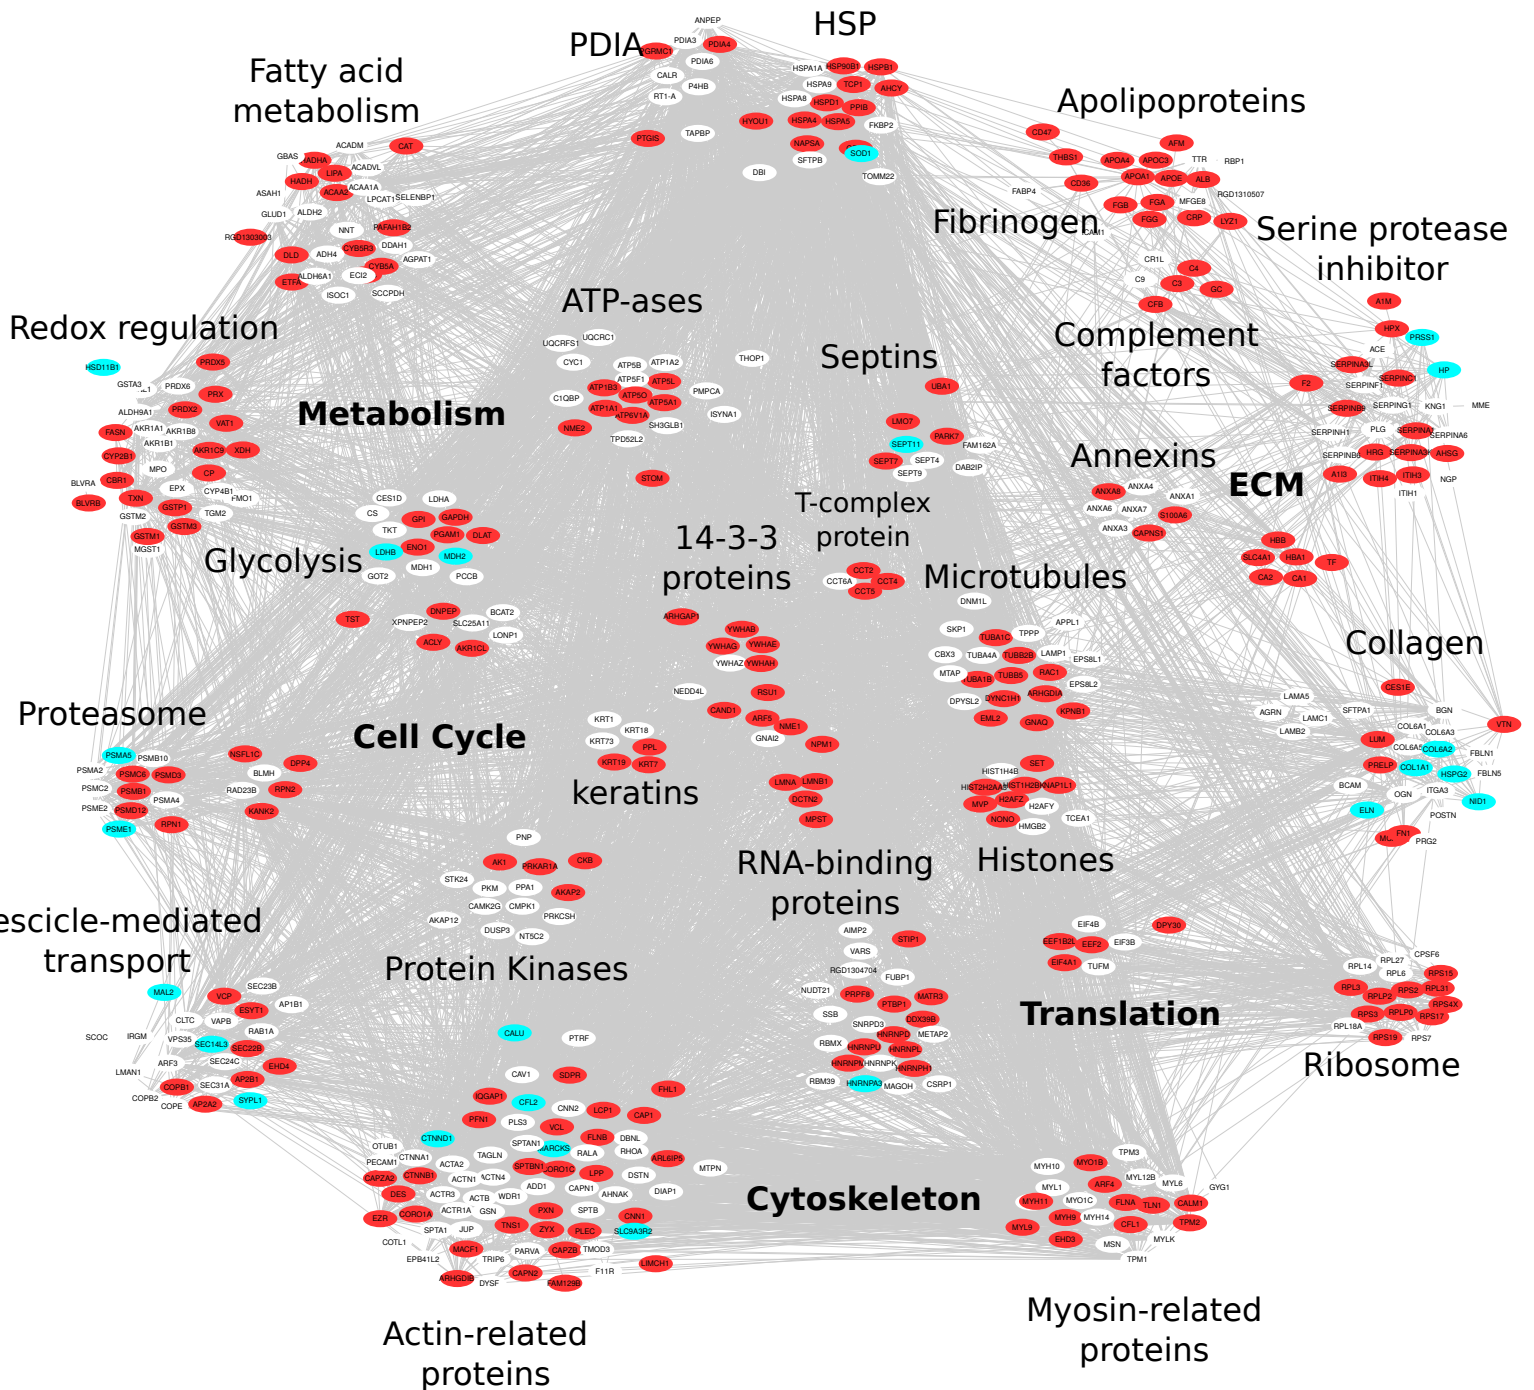

● up-regulated in Native  
● up-regulated in post-EVLP  
● unchanged

Supplement: s1 [file s1]

# pre-EVLP vs post-EVLP

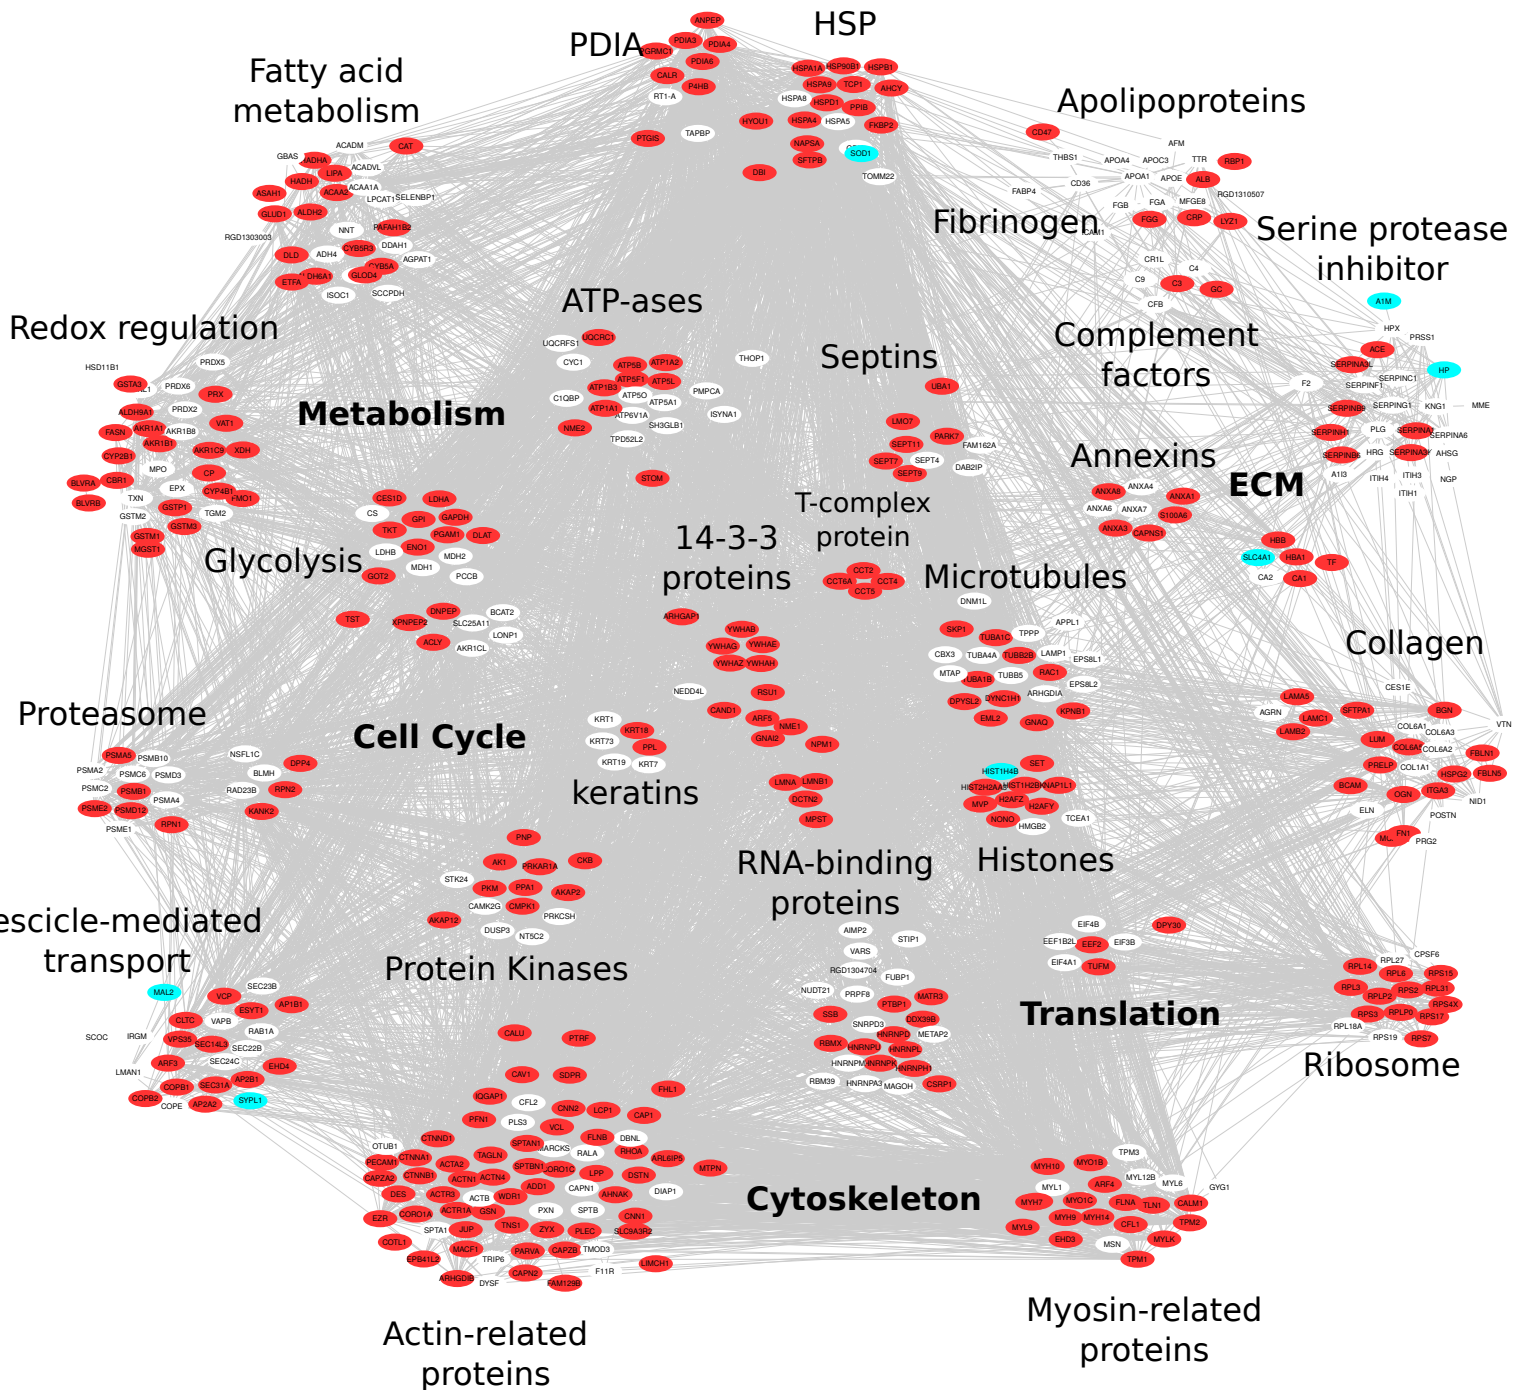

● up-regulated in pre-EVLP  
● up-regulated in post-EVLP  
● unchanged

Supplement: s1 [file s1]
